# Supplementary material
Source: HighWire-hosted journal article supplement (http://www.jneurosci.org/highwire/filestream/598539/field_highwire_adjunct_files/1/legend.pdf)
Supplement: legend.pdf [file legend.pdf]

**Supplementary Figure 1 – Short-term depression of KAR-EPSCs is not affected by changing the probability of release at mossy fiber synapses nor by blocking type 1 cannabinoid receptor activation (CB1).**

(A) Representative traces illustrating short-term depression of mossy fiber KAR-EPSCs in CA3 pyramidal cells obtained in the presence of the CB1 receptor antagonist, SR141617A (4  $\mu$ M). (B) Summary plot of the effects of changing the probability of release using pharmacological manipulations and of blocking the CB1 receptor activation on short-term depression of KAR-EPSCs. (C) Summary of the effects of the different drugs used to alter probability of release at mossy fiber synapses. As previously described, the adenosine A<sub>1</sub> receptor antagonist, DPCPX (100 nM) and forskolin (10  $\mu$ M), increased mossy fiber synaptic transmission, in contrast to CADO (10  $\mu$ M), an A<sub>1</sub> receptors agonist, which as expected, decreased mossy fiber synaptic transmission.
